# Supplementary material
Source: MDPI journal article supplement (https://www.mdpi.com/2073-4344/11/10/1186)
Supplement: s1 [file s1]

# **TiO<sub>2</sub>@MOF Photocatalyst for the Synergetic Oxidation of Microcystin-LR and Reduction of Cr(VI) in Aqueous Media**

**Yarui Wang<sup>1,2</sup>, Wanchao Yu<sup>1,2</sup>, Fanglan Geng<sup>1</sup>, Lixia Zhao<sup>1,2,3,\*</sup>, Yawei Wang<sup>1,2,3</sup>**

1 State Key Laboratory of Environmental Chemistry and Eco-toxicology, Research Center for Eco-environmental Sciences, Chinese Academy of Sciences, 18 Shuangqing Road, P.O. Box 2871, Beijing 100085, China;

2 University of Chinese Academy of Sciences, Beijing 100049, China;

3 School of Environment, Hangzhou Institute for Advanced Study, UCAS, Hangzhou, 310007, P. R. China;

\*Corresponding author. State Key Laboratory of Environmental Chemistry and Eco-toxicology, Research Center for Eco-Environmental Sciences, Chinese Academy of Sciences, 18 Shuangqing Road, Beijing 100085, P. R. China.

E-mail: [zlx@rcees.ac.cn](mailto:zlx@rcees.ac.cn);

Tel: (86) 10-62849338

**Table S1.** The precise position, FWHM and %area of Ti 2p fitted for different TiO<sub>2</sub> and MIL-101(Fe)/ TiO<sub>2</sub>.

| Name                                  | Pos. (eV) | FWHM | AERA   |
|---------------------------------------|-----------|------|--------|
| Ti2p (TiO <sub>2</sub> )              | 464.5     | 1.48 | 32.15% |
|                                       | 458.8     | 0.88 | 67.85% |
| Ti2p (MIL-101(Fe)/ TiO <sub>2</sub> ) | 464.8     | 2.12 | 30.90% |
|                                       | 459.1     | 1.66 | 69.10% |

**Table S2.** The precise position, FWHM and %area of O 1s fitted for different TiO<sub>2</sub> and MIL-101(Fe)/ TiO<sub>2</sub>.

| Name                                | Pos. (eV) | FWHM | AERA   |
|-------------------------------------|-----------|------|--------|
| O1s (TiO <sub>2</sub> )             | 529.9     | 1.20 | 43.44% |
|                                     | 530.4     | 1.50 | 43.44% |
|                                     | 532.2     | 1.05 | 13.13% |
| O1s (MIL-101(Fe))                   | 532.3     | 1.97 | 84.81% |
|                                     | 531.4     | 2.02 | 15.19% |
| O1s (MIL-101(Fe)/TiO <sub>2</sub> ) | 532.2     | 1.90 | 57.65% |
|                                     | 531.3     | 2.00 | 21.96% |
|                                     | 530.1     | 1.22 | 43.44% |

**Table S3.** The precise position, FWHM and %area of Fe 2p fitted for MIL-101(Fe).

| <b>Name</b>          | <b>Pos. (eV)</b> | <b>FWHM</b> | <b>AERA</b> |
|----------------------|------------------|-------------|-------------|
| Fe 2p <sub>3/2</sub> | 712.3            | 3.20        | 44.9%       |
| Fe 2p <sub>1/2</sub> | 725.9            | 5.00        | 31.9%       |
| Fe(III)              | 715.6            | 5.00        | 15.9%       |
| Fe(III)              | 729.2            | 2.60        | 1.9%        |
| Fe 2p <sub>3/2</sub> | 719.5            | 3.00        | 3.2%        |
| Fe 2p <sub>1/2</sub> | 732.9            | 3.00        | 2.2%        |

**Table S4.** The precise position, FWHM and %area of Fe 2p fitted for MIL-101(Fe)/TiO<sub>2</sub>.

| <b>Name</b>          | <b>Pos. (eV)</b> | <b>FWHM</b> | <b>AERA</b> |
|----------------------|------------------|-------------|-------------|
| Fe 2p <sub>3/2</sub> | 711.5            | 2.50        | 23.5%       |
| Fe 2p <sub>1/2</sub> | 725.4            | 4.00        | 24.5%       |
| Fe(III)              | 714.0            | 4.00        | 26.7%       |
| Fe(III)              | 728.3            | 4.00        | 5.1%        |
| Fe 2p <sub>3/2</sub> | 719.0            | 4.00        | 9.2%        |
| Fe 2p <sub>1/2</sub> | 731.9            | 6.00        | 11.8%       |

**Table S5.** Rate constant  $k_{Cr}$  and  $k_{MC-LR}$  of photocatalytic reduction of Cr (VI) and MC-LR

| Photocatalyst                                                   | Conditions                                                                                      | $k_{Cr}$ (min <sup>-1</sup> ) | $k_{MC-LR}$ (min <sup>-1</sup> ) | Reference |
|-----------------------------------------------------------------|-------------------------------------------------------------------------------------------------|-------------------------------|----------------------------------|-----------|
| Zn-MOF                                                          | [Catalyst] = 1 g/ L; [ Cr(VI)] <sub>0</sub> = 20 ppm; pH= 4                                     | 0.0001                        | --                               | [1]       |
| CuS/TiO <sub>2</sub>                                            | [Catalyst] = 1 g/ L; [ Cr(VI)] <sub>0</sub> = 30 ppm; pH= 5.2                                   | 0.003                         | --                               | [2]       |
| TiO <sub>2</sub> /β-FeOOH                                       | [Catalyst] = 0.2 g/ L; [ Cr(VI)] <sub>0</sub> = 100 ppm ; pH 4.0;                               | 0.210                         | ---                              | [3]       |
| MIL-100(Fe)/g-C <sub>3</sub> N <sub>4</sub>                     | [Catalyst] = 0.2 g/ L; [ Cr(VI)] <sub>0</sub> = 10 ppm ; pH=2.0;                                | 0.037                         | --                               | [4]       |
| Fe <sub>2</sub> O <sub>3</sub> /Bi <sub>2</sub> WO <sub>6</sub> | [Catalyst] = 5 g/ L; [ MC-LR] <sub>0</sub> = 2 ppm; pH=3.7;                                     | --                            | 0.026                            | [5]       |
| MIL-100/MIL-53 (Fe)                                             | [Catalyst] = 0.02 g/ L; [ MC-LR] <sub>0</sub> = 4.5 ppm; pH=7;                                  | --                            | 0.184                            | [6]       |
| GO–TiO <sub>2</sub>                                             | [Catalyst] = 0.2 g/ L; [ MC-LR] <sub>0</sub> = 10 ppm; pH=5.8;                                  | --                            | 0.023                            | [7]       |
| AgBr/Ag <sub>3</sub> PO <sub>4</sub> /TiO <sub>2</sub>          | [Catalyst] = 0.3 g/L ; [ MC-LR] <sub>0</sub> = 0.12 ppm; pH = 6                                 | --                            | 0.637                            | [8]       |
| Our work                                                        | [Catalyst] = 0.05 g/L; [ MC-LR] <sub>0</sub> = 1.5 ppm; [Cr(VI)] <sub>0</sub> = 2 ppm; pH = 4.9 | 0.530                         | 0.060                            | Our work  |

## Reference

- [1] Kumar V., Singh V., Kim K., Kwon E., Younis S., Metal-organic frameworks for photocatalytic detoxification of chromium and uranium in water, *Coord. Chem. Rev.* **2021**, 447, 214148.
- [2] Wu Z.; Liu X.; Yu C.; Zhou W.; Wei L., Construct interesting CuS/TiO<sub>2</sub> architectures for effective removal of Cr(VI) in simulated wastewater via the strong synergistic adsorption and photocatalytic process, *Sci. Total Environ.* **2021**, 148941.
- [3] Zhang M., Xu Z., Liang J., Zhou L., Zhang C., Potential application of novel TiO<sub>2</sub>/beta-FeOOH composites for photocatalytic reduction of Cr(VI) with an analysis of statistical approach, *Int. J. of Environ. Sci. Te.* **2015**, 12, 1669-1676.

- [4] Du X., Yi X., Wang P., Deng J., Wang C., Enhanced photocatalytic Cr(VI) reduction and diclofenac sodium degradation under simulated sunlight irradiation over MIL-100(Fe)/g-C<sub>3</sub>N<sub>4</sub> heterojunctions, *Chinese J. Catal.* **2019**, 40 70-79.
- [5] Ni L., Du C., Wu H., Li Y., Li X., Xu C., Preparation and characterization of Fe<sub>2</sub>O<sub>3</sub>/Bi<sub>2</sub>WO<sub>6</sub> composite and photocatalytic degradation mechanism of microcystin-LR, *Water Science and Engineering*, **2021**, 14 109-118.
- [6] Tian H., Araya T., Li R., Fang Y., Huang Y., Removal of MC-LR using the stable and efficient MIL-100/MIL-53 (Fe) photocatalyst: The effect of coordinate immobilized layers, *Appl. Catal. B-Environ.* **2019**, 254, 371-379.
- [7] Fotiou T., Triantis T., Kaloudis T., Pastrana-Martínez L., Likodimos V., Falaras P., Silva A., Hiskia A., Photocatalytic Degradation of Microcystin-LR and Off-Odor Compounds in Water under UV-A and Solar Light with a Nanostructured Photocatalyst Based on Reduced Graphene Oxide–TiO<sub>2</sub> Composite. Identification of Intermediate Products, *Industrial & Engineering Chemistry Research*, **2013**, 52, 13991-14000.
- [8] Wang X., Utsumi M., Yang Y., Li D., Zhao Y., Zhang Z., Feng C., Sugiura N., Cheng J.J., Degradation of microcystin-LR by highly efficient AgBr/Ag<sub>3</sub>PO<sub>4</sub>/TiO<sub>2</sub> heterojunction photocatalyst under simulated solar light irradiation, *Appl. Surf. Sci.* **2015**, 325 1-12.
